# Supplementary material
Source: PubMed Central journal article supplement (PMC4839001)

Cell Reports

Supplemental Information

## **Disruption of O-linked N-Acetylglucosamine**

## **Signaling Induces ER Stress and $\beta$ Cell Failure**

Emilyn U. Alejandro, Nadejda Bozadjieva, Doga Kumusoglu, Sarah Abdulhamid,  
Hannah Levine, Leena Haataja, Suryakiran Vadrevu, Leslie S. Satin, Peter Arvan, and  
Ernesto Bernal-Mizrachi

**Supplemental to Figure 1: Supplemental Experimental Procedure 1, Generation of mice harboring  $\beta$ -cell specific deletion of OGT. (A)** Breeding schemes for the generation of  $\beta$ -cell specific  $\beta$ OGT-KO mice. **(B)** Immunofluorescence staining of GFP (green) and insulin (blue) in 4-week-old  $\beta$ OGT<sup>-y</sup> mice, indicating efficiency of the RIPCre enzyme. **(C)** OGT mRNA expression in islets corrected to actin in  $\beta$ OGT-KO mice. **(D-E)** OGT protein levels in hypothalamus (D) and liver (E) lysates from  $\beta$ OGT-KO and control mice. Quantification showing the ratio of OGT and Vinculin. **(F)** IPGTT was performed in 4-week-old  $\beta$ OGT<sup>-y</sup> and control mice. \* $P < 0.05$ ,  $\beta$ OGT<sup>-/-</sup> vs. control, n=3.

**Supplemental to Figure 2: Supplemental to Main Figure 2, Female  $\beta$ OGT<sup>-/-</sup> mice exhibit reduced  $\beta$ -cell mass and calcium signaling. (A)** Reduced  $\beta$ -cell mass in 20-week-old  $\beta$ OGT<sup>-/-</sup> mice compared to control. **(B)** Measurement of intracellular Ca<sup>2+</sup> in islets of  $\beta$ OGT<sup>-/-</sup> mice in various ages as shown.

**Supplemental Figure 3. Supplemental to Main Figure 3, Transcription levels in normoglycemic in  $\beta$ OGTKO and GFP expression in inducible i $\beta$ OGT<sup>-y</sup> mice. (A,B)** Insulin content corrected to DNA in 4-week-old  $\beta$ OGT<sup>-y</sup> (A) or 6-8 week-old  $\beta$ OGT<sup>-/-</sup> (F) mice and control. **(C-I)** Quantitative PCR was performed for *Ins1*, *Ins2*, *Pdx-1*, and *NeuroD1* mRNA expression in islets of 4-5 week-old  $\beta$ OGT<sup>-y</sup> (C,E,G,I)  $\beta$ OGT<sup>-/-</sup> (D,F,H) mice and control. Transcript levels were normalized to  $\beta$ -actin. **(J)** Immunofluorescence staining of GFP (green), insulin (blue), and glucagon (red) in inducible i $\beta$ OGT<sup>-y</sup> (MIP-CreERTM;CAG-ZsGreen;OGT<sup>-y</sup>) and control (MIP-CreERTM;CAG-ZsGreen) mice. **(K)** Quantification of GFP and insulin expressing cells in islets of i $\beta$ OGT<sup>-y</sup> and control mice. \* $P < 0.05$  vs. i $\beta$ OGT<sup>-y</sup> or  $\beta$ OGT<sup>-/-</sup> and control, n=3-4.

**Supplemental Figure 4. Supplemental to Main Figure 4, Phloridzin, partially ameliorates the development of diabetes in 10-week-old mice lacking OGT. (A)**

IPGTT was performed in 10-week-old  $\beta$ OGT<sup>-/y</sup> mice before Phloridzin (PHZ) treatment. **(B)** Glucose levels during a 12-hour fasting period on 20 of PHZ treatment. **(C)** Fed glucose levels in  $\beta$ OGT<sup>-/y</sup> and control mice treated with PHZ. **(D)** IPGTT was performed on day 20 of PHZ treatment. **(E)** IPGTT was performed in 12-week-old  $\beta$ OGT<sup>-/y</sup> mice with or without 20 days of PHZ treatment. **(F)** Quantification of area under curve (AUC) of A. **(G-H)** Fed (G) and fasting (H) insulin levels measured on day 15 and 20 of PHZ treatment respectively. \**P* < 0.05,  $\beta$ OGT<sup>-/y</sup> and control, n=5.

**Supplemental Figure 5. Supplemental to Main Figure 5, Increased Proinsulin levels in young and normoglycemic mice lacking OGT.** **(A)** Fed insulin levels in 4-week-old  $\beta$ OGT<sup>-y</sup> mice. **(B-C)** Proinsulin level (B) and Proinsulin/insulin (C) ratio in 4-week-old  $\beta$ OGT<sup>-y</sup> mice. **(D)** Quantification of proinsulin localizing in the ER (arrowhead with tail) or Golgi (arrowhead). **(E)** Confocal images of islets from 4-week-old male  $\beta$ OGT<sup>-y</sup> mice; insulin (blue), proinsulin (red), and calnexin (green). **(F)** ER stress marker BiP protein expression in islets from 8-week-old  $\beta$ OGT<sup>-/-</sup> and control mice. \**P* < 0.05 vs. control, n=4-5.

**Supplemental Figure 6. Supplemental to Main Figure 6, Phosphorylated GSK3 staining in mice overexpressing Akt and lacking OGT.** **(A)** Immunofluorescence images of islets from  $\beta$ OGT<sup>-/-</sup> and  $\beta$ OGT<sup>-/-</sup>;Akt(Tg); insulin (green), PhosphoGSK3 $\beta$ (Ser9) (red), and Dapi (blue). Images shown are taken in 40x magnification. **(B)** O-GlcNAc level, a read out of OGT activity, in islets from 8-week-old  $\beta$ OGT<sup>-/-</sup>;Akt(Tg),  $\beta$ OGT<sup>-/-</sup> and control mice.

**Supplemental Figure 7. Supplemental to Main Figure 6, Proinsulin staining in mice overexpressing Akt and lacking OGT.** **(A)** Confocal images of islets from control,  $\beta$ OGT<sup>-/-</sup> and  $\beta$ OGT<sup>-/-</sup>;Akt(Tg) mice; insulin (blue), proinsulin (red), and calnexin (green).

Supplemental Figure 1

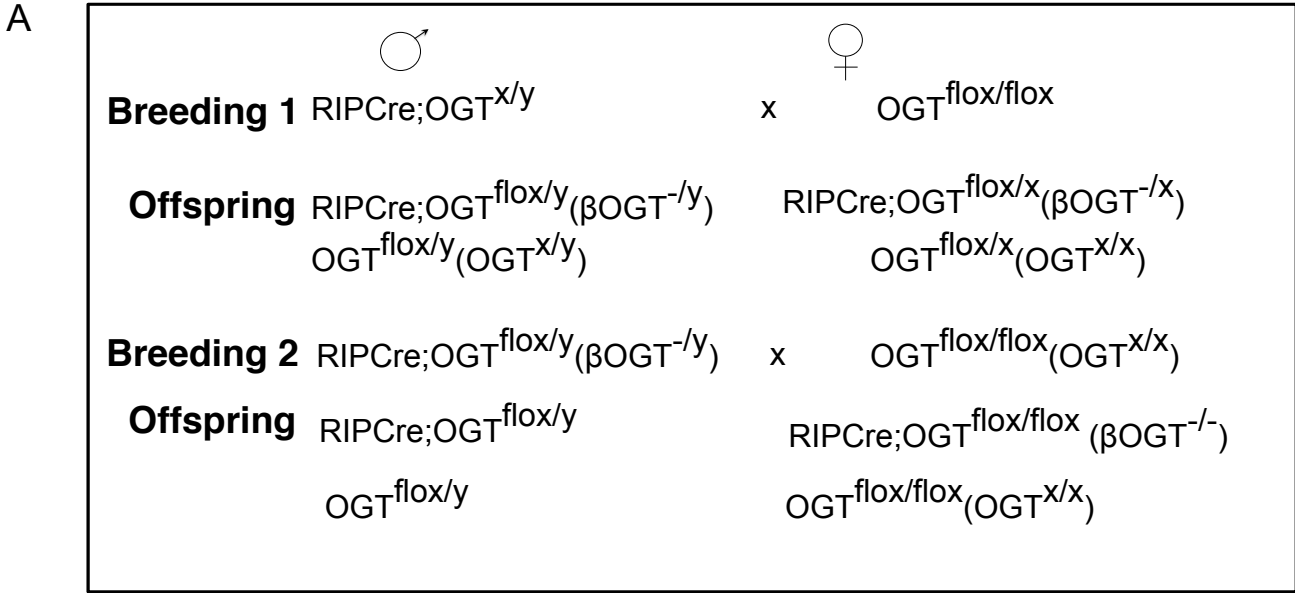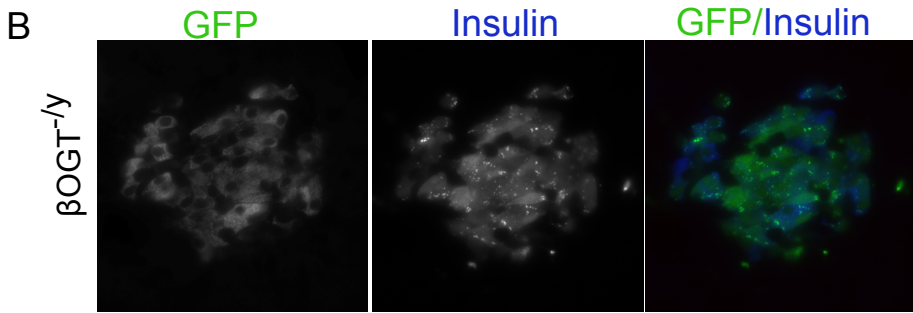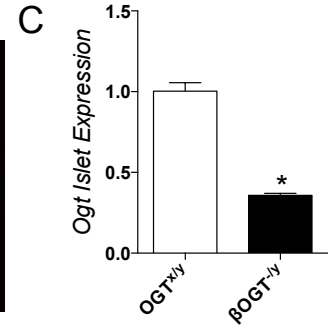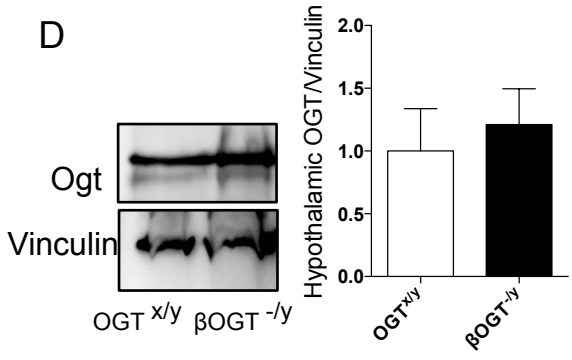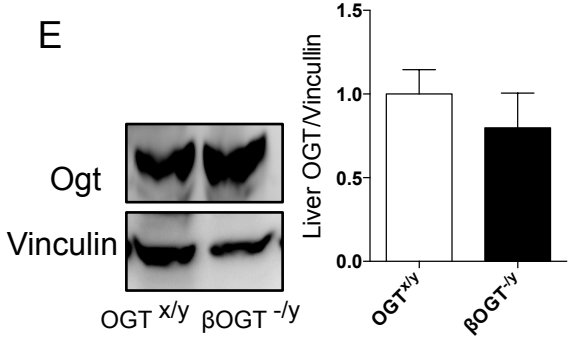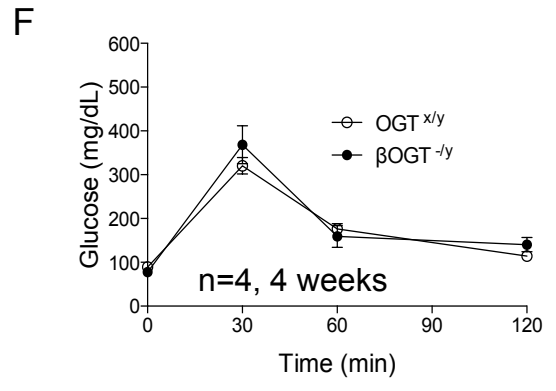

# Supplemental Figure 2

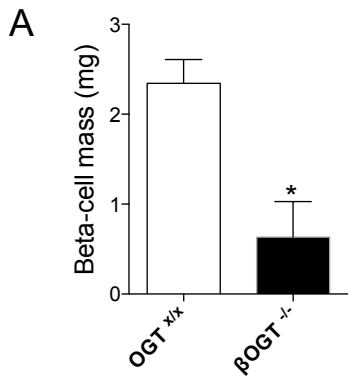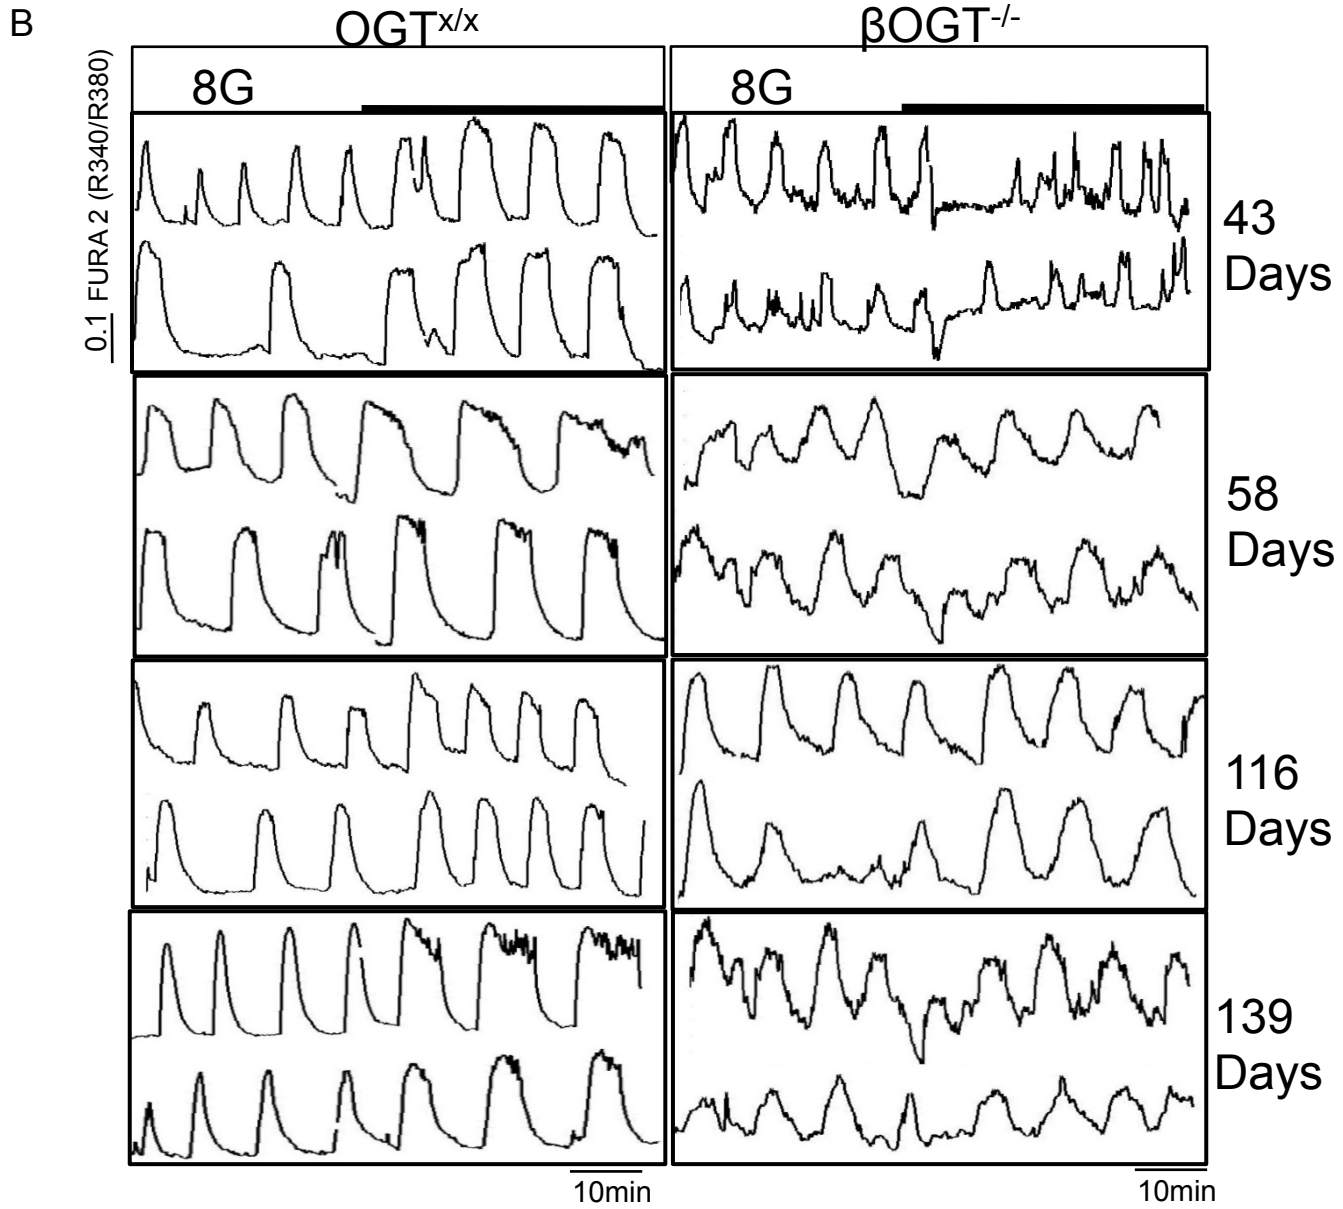

### Supplemental Figure 3

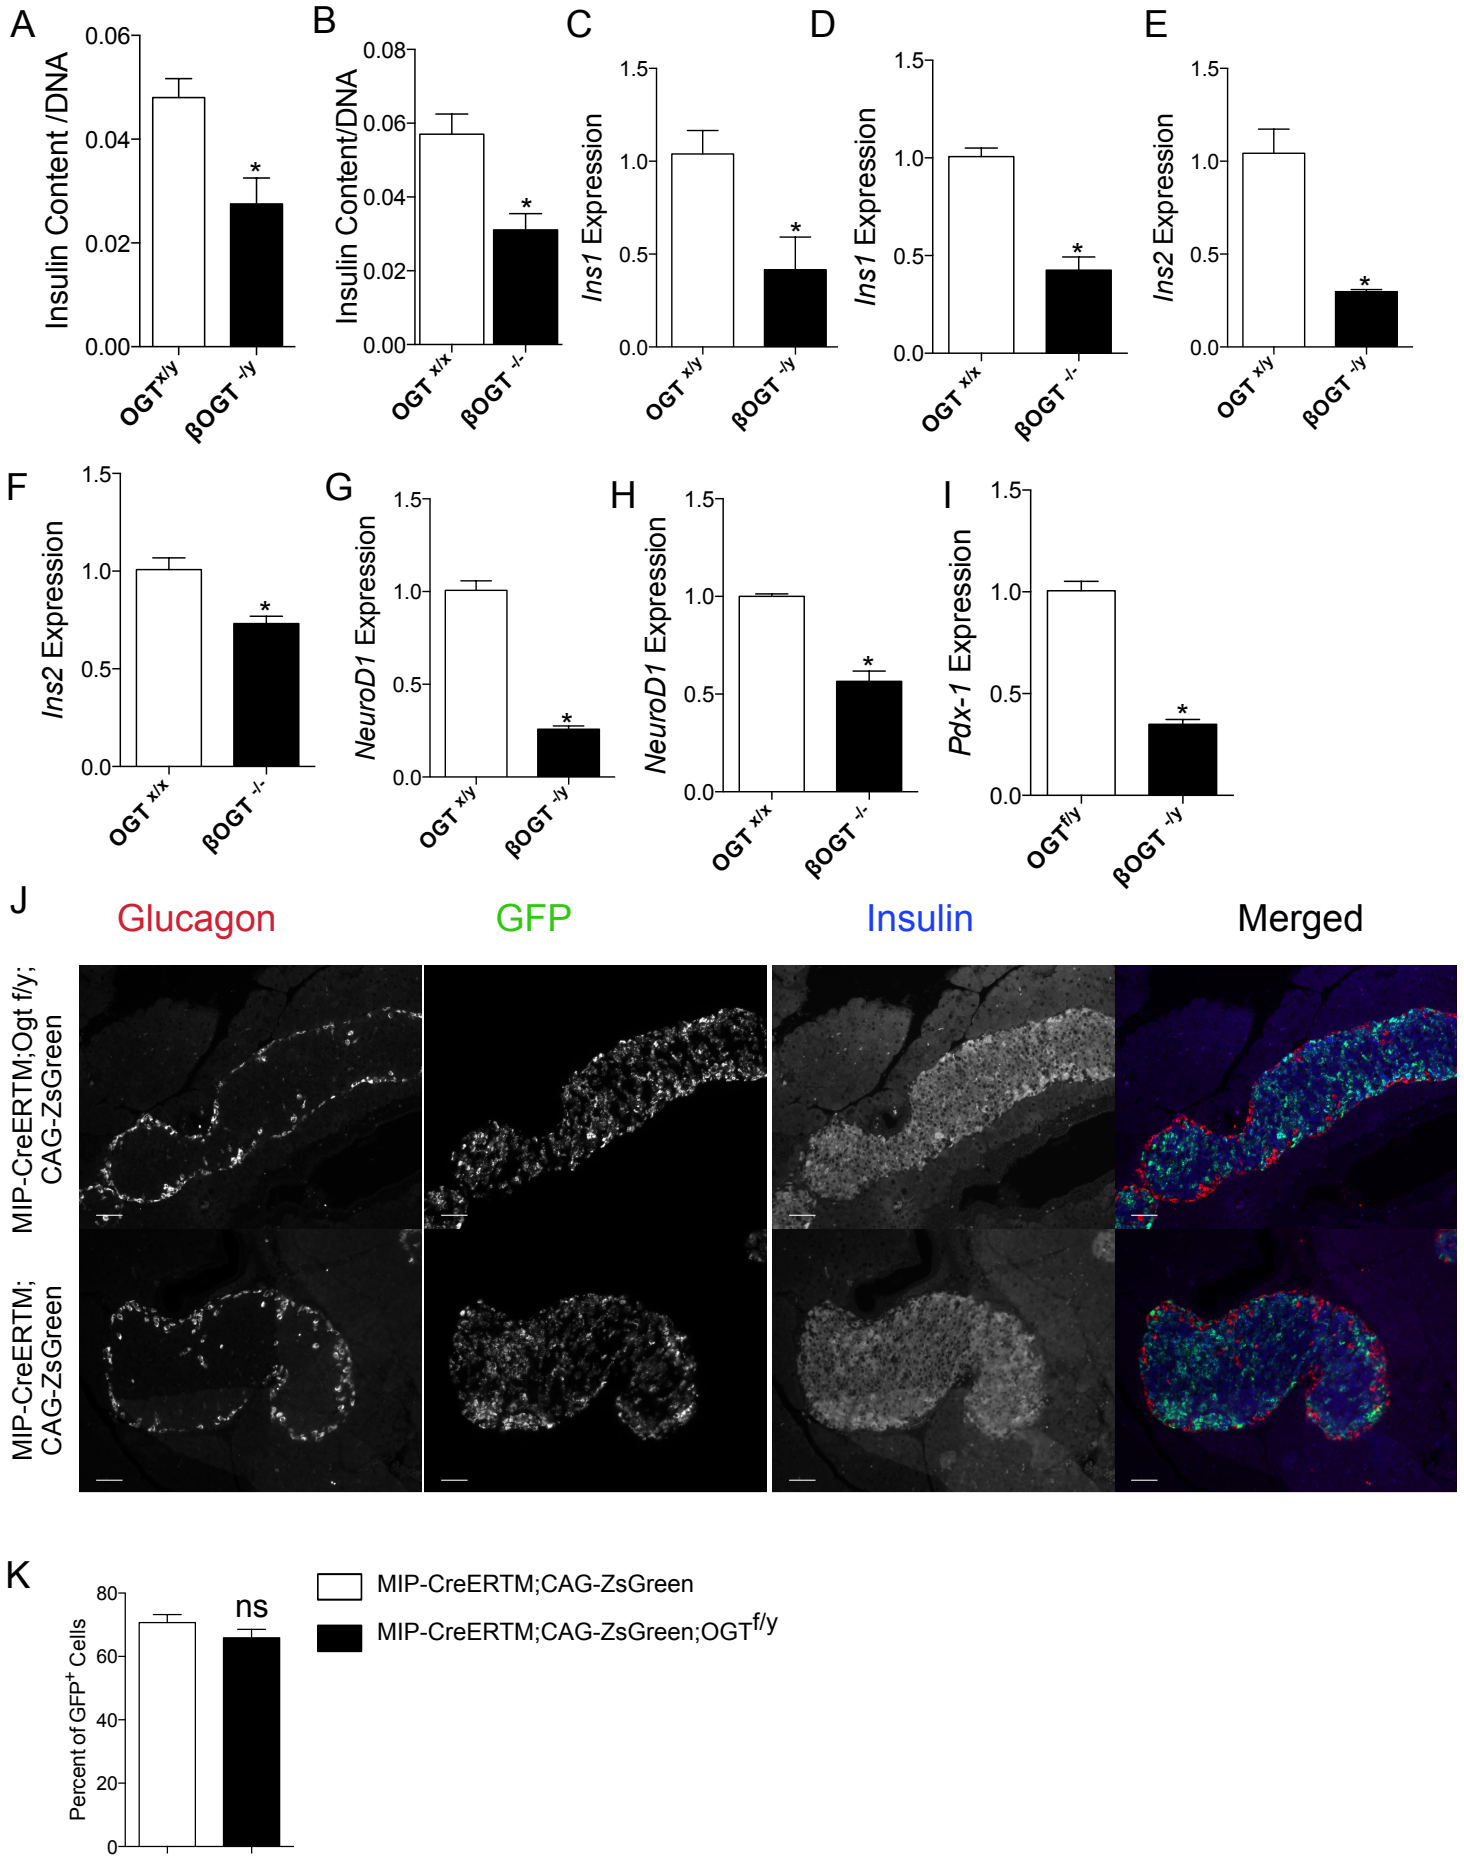

# Supplemental Figure 4

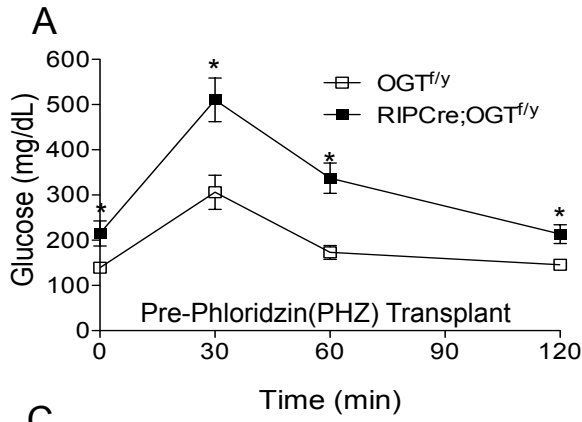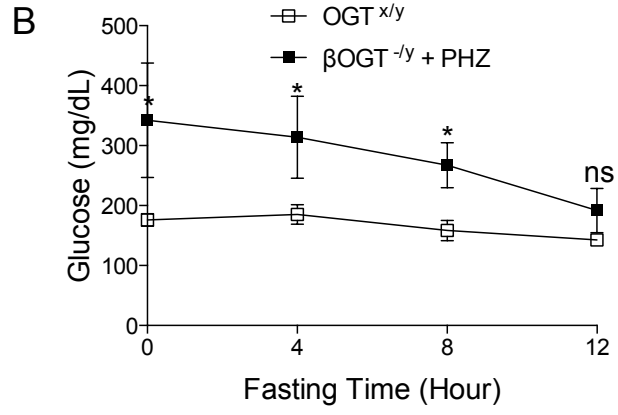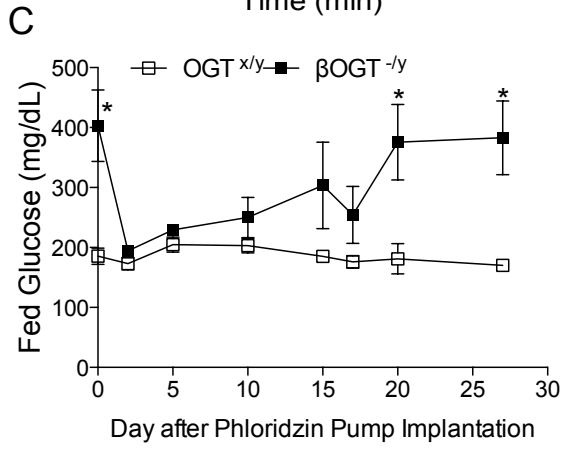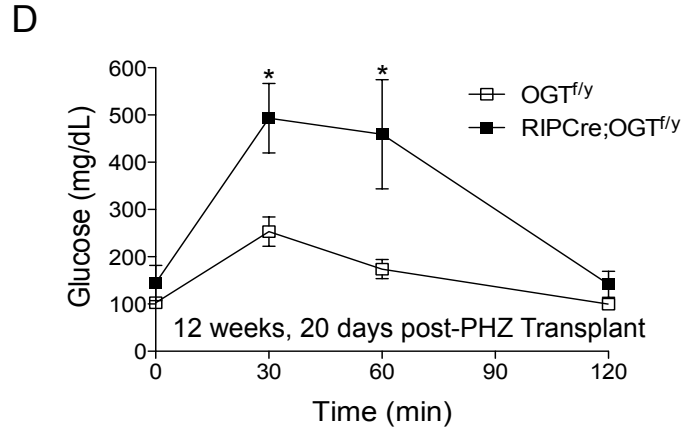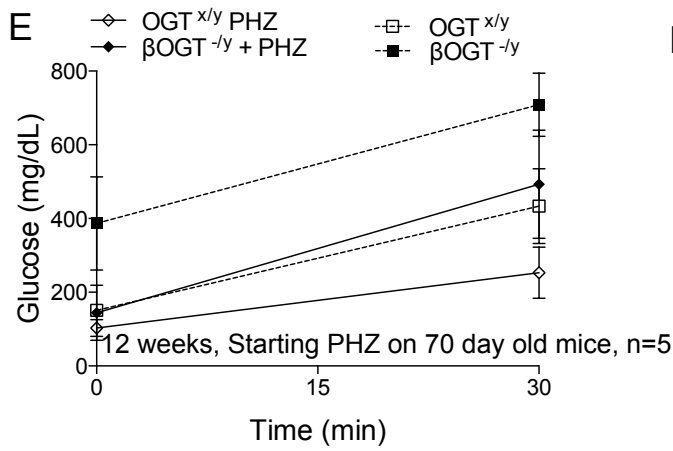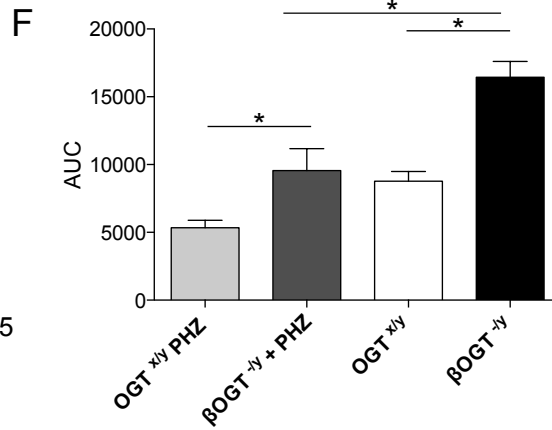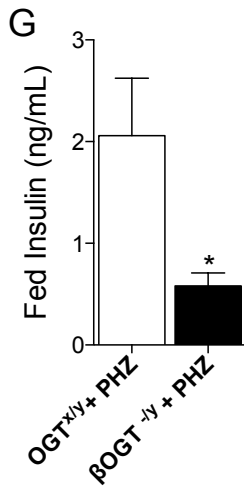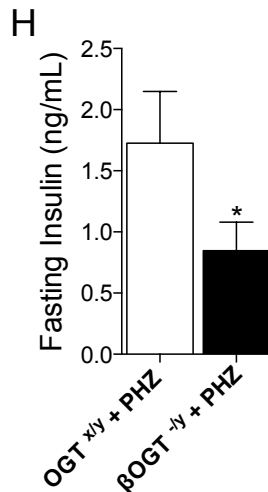

# Supplemental Figure 5

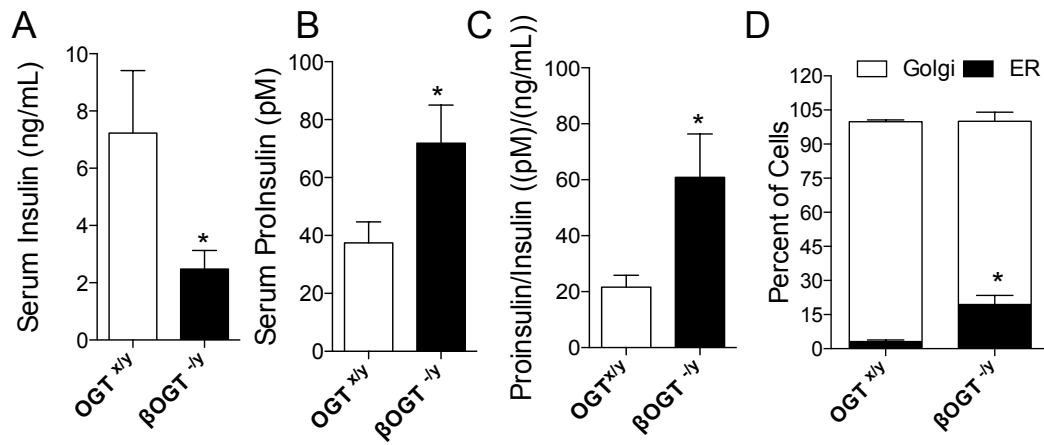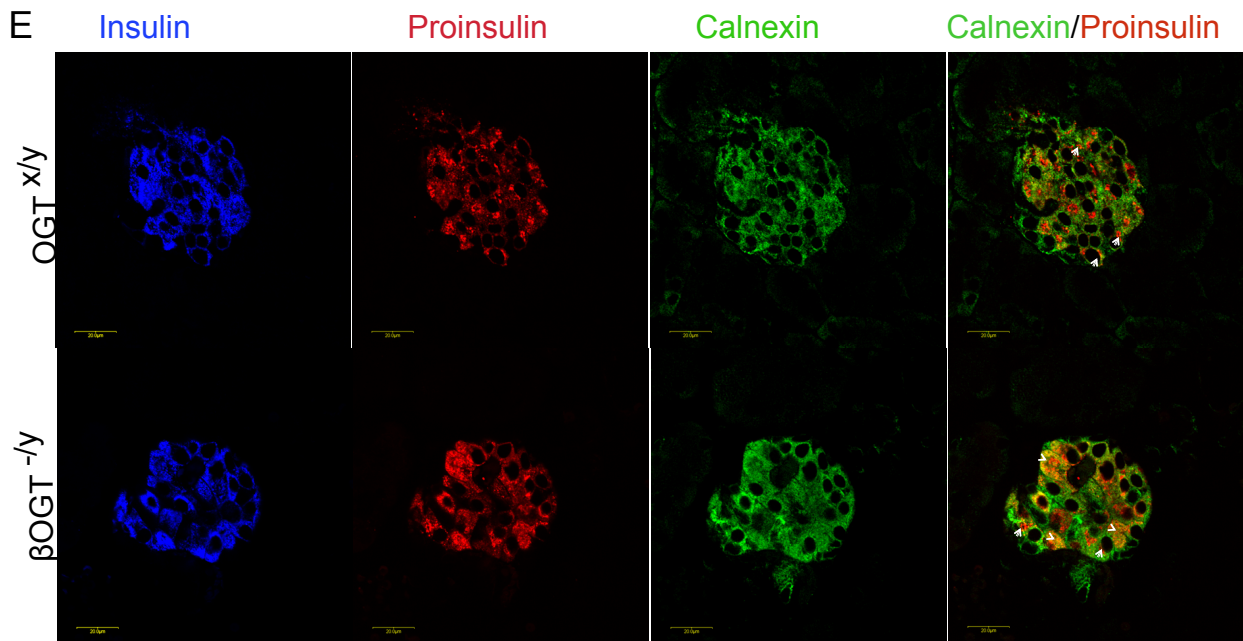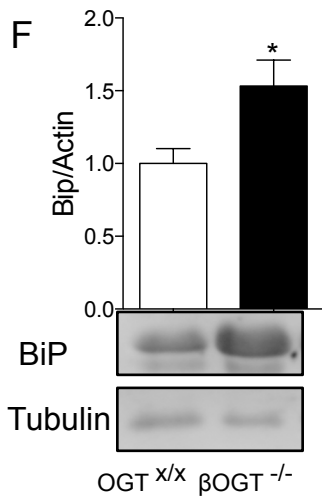



Supplemental Figure 6

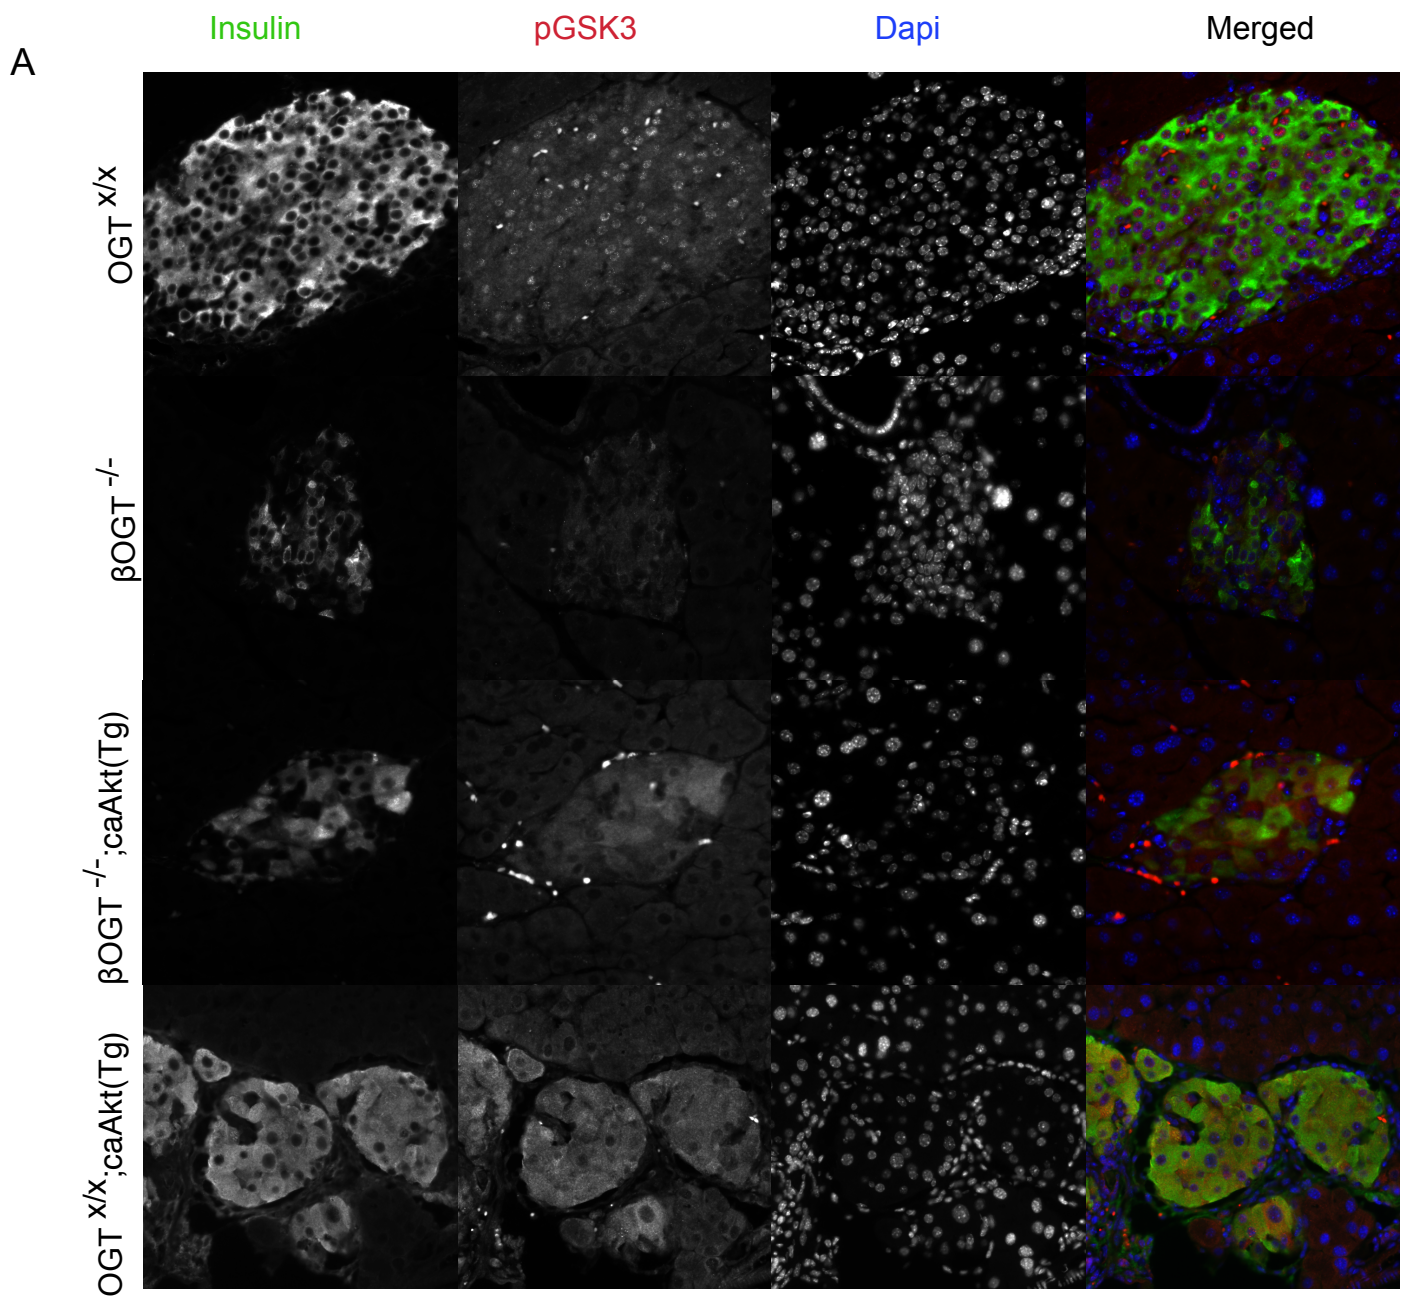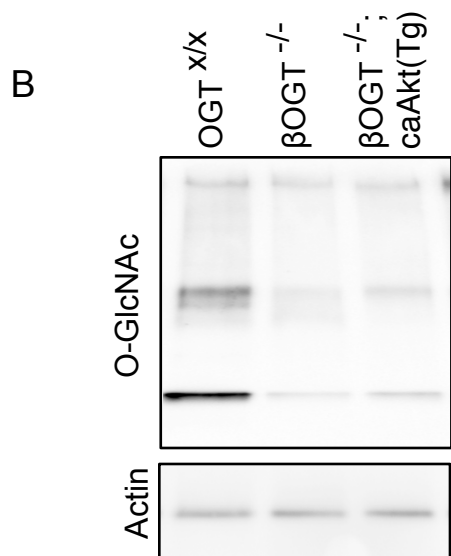

Supplemental Figure 7

A

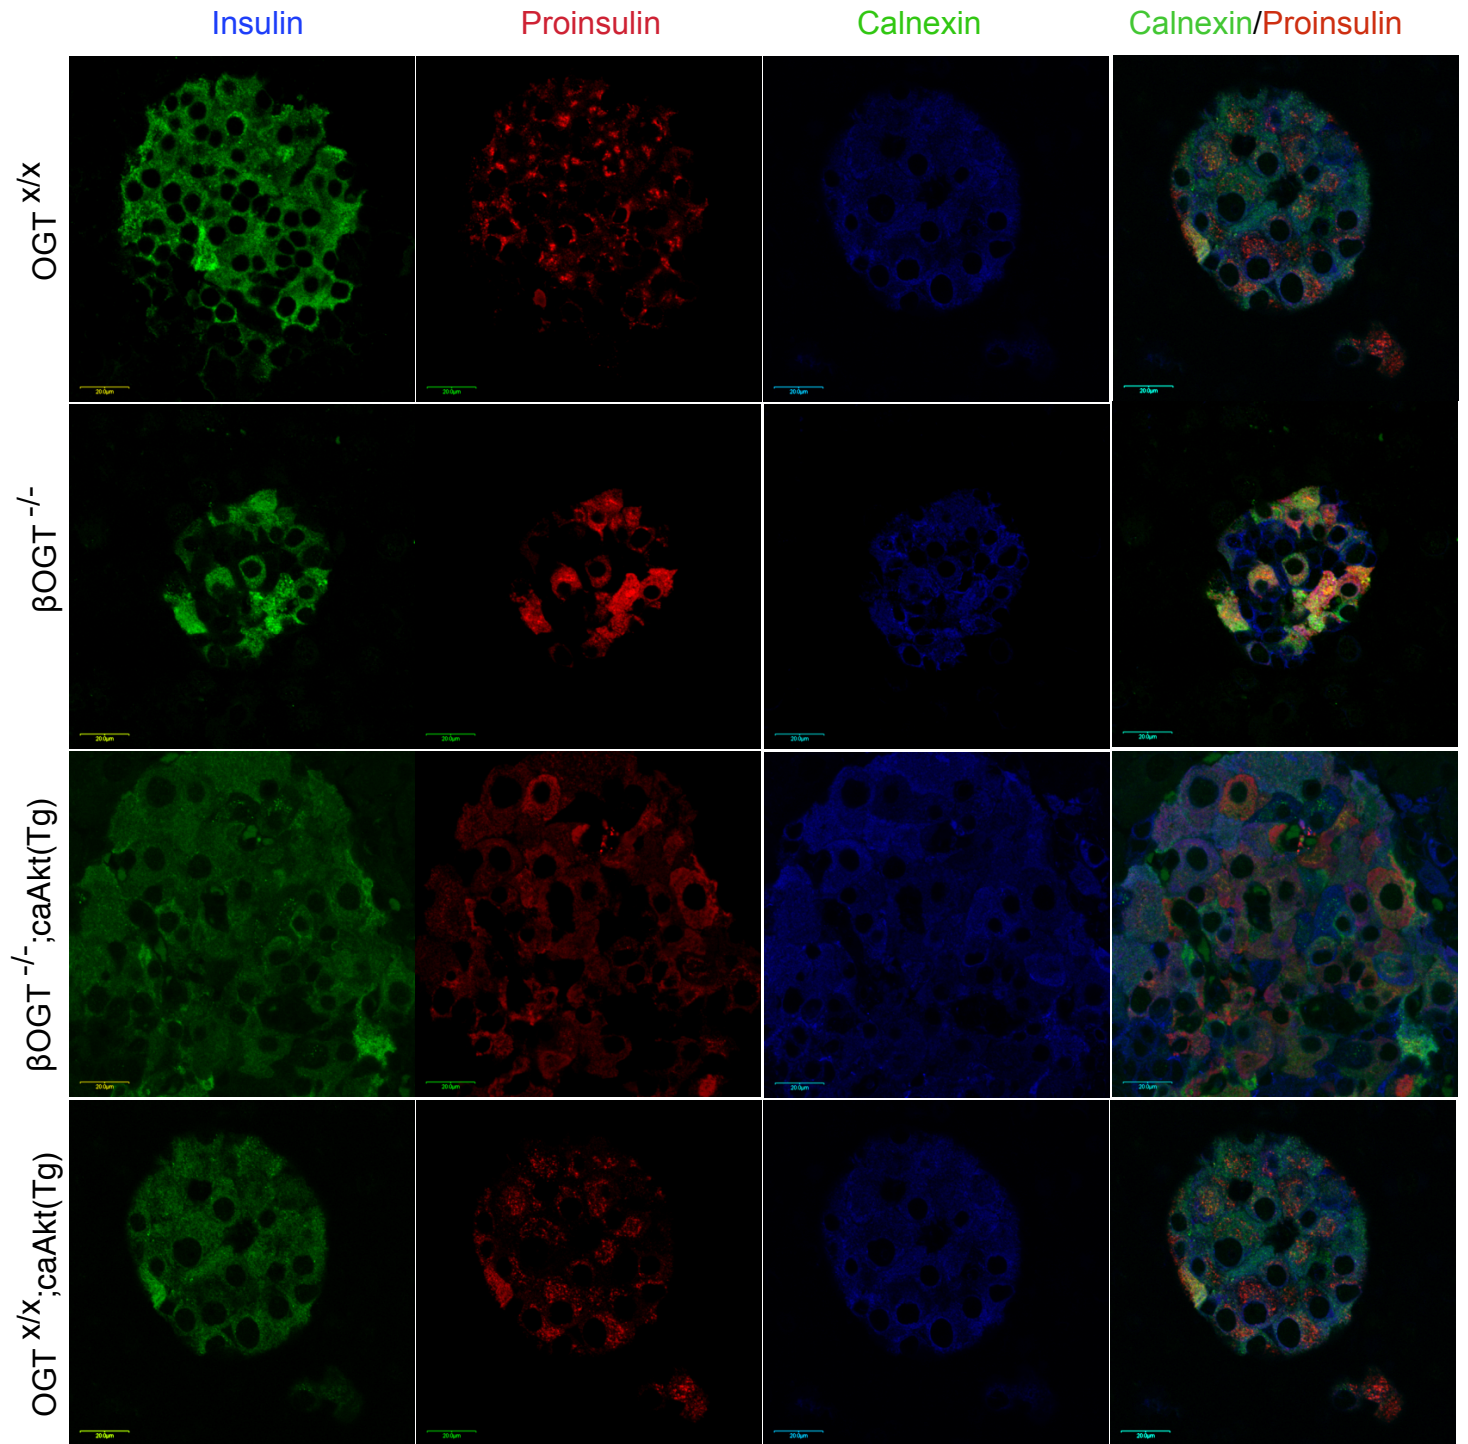

Supplement: NIHMS737176-supplement-suppl_mmc1.pdf [file NIHMS737176-supplement-suppl_mmc1.pdf]
